# Supplementary material for: Aging-regulated anti-apoptotic long non-coding RNA Sarrah augments recovery from acute myocardial infarction
Source: Nat Commun. 2020 Apr 27;11:2039. doi: 10.1038/s41467-020-15995-2 (PMC7184724; doi:10.1038/s41467-020-15995-2)
Supplement: Supplementary file 4 — Source Data [file 41467_2020_15995_MOESM4_ESM.xlsx]

## Sheet: 1a
siRNA	n=4	+H2O2	A	M
ENSMUST00000130695	76710.7	147952	16.701	0.947629
ENSMUST00000164646_1	92145.3	111194	16.6272	0.271101
ENSMUST00000164058_1	81781.1	119358	16.5922	0.54546
ENSMUST00000149731	82892.2	113260	16.5641	0.450332
ENSMUST00000133808	85213.1	104701	16.5274	0.297126
n293441_AK014716_1	73559.9	107284	16.4389	0.544449
ENSMUST00000172212_1	61397	124463	16.4156	1.01948
ENSMUST00000150145_1	63349.7	114947	16.3808	0.859558
ENSMUST00000138373	63014.1	111314	16.3538	0.820893
ENSMUST00000172367_6	64108.5	99484.2	16.2852	0.633952
ENSMUST00000128209	65938.1	93099.4	16.2577	0.49766
ENSMUST00000166143_1	57049.2	107478	16.2568	0.913767
ENSMUST00000165977_3	56378.5	100110	16.197	0.828374
ENSMUST00000124586_1	67461.4	79460.6	16.1599	0.236176
ENSMUST00000133550_1	66190.9	80177.1	16.1526	0.276556
n270885_AK142309_1	57992.9	88993.2	16.1325	0.617818
ENSMUST00000136401	63653.6	78648.2	16.1105	0.305173
n295070_AK011722_4	56699.6	87545.7	16.1044	0.626697
ENSMUST00000163181_1	55206	87151.7	16.0819	0.658704
n274891_AK081770_1	53633.2	88468.4	16.0719	0.722036
ENSMUST00000165130_1	54327	86722.2	16.0667	0.674732
ENSMUST00000123480	56357.9	82083.9	16.0536	0.542481
ENSMUST00000169514_1	50762.7	86701.4	16.0176	0.772285
ENSMUST00000170084_1	42225.2	104074	16.0165	1.30143
n344161_Null_1	46366.5	89344.5	15.9739	0.946297
ENSMUST00000099440_1	48304	79908.1	15.923	0.7262
ENSMUST00000136217_1	42711.2	87226.1	15.8974	1.03014
ENSMUST00000152384	50635	73522.1	15.8969	0.538042
n417922_Null_1	46202.2	78259.1	15.8758	0.760299
n296352_AK028088_1	48370.6	74712.6	15.8755	0.627222
ENSMUST00000139440_2	43919.1	77692.1	15.834	0.82292
n280806_AK080260	41112.6	81893.3	15.8244	0.994167
ENSMUST00000142067_2	42810	78416.1	15.8223	0.873202
n273153_AK050174_1	41980.6	72564.7	15.7522	0.789544
ENSMUST00000097531	42868.1	67604.7	15.7162	0.657221
ENSMUST00000140003	60847.8	46064.9	15.6921	-0.401538
ENSMUST00000145196_1	38317.9	72868.3	15.6894	0.927272
n286773_AK136792_1	42661.1	64158.6	15.675	0.588723
ENSMUST00000146251	43235.6	63150.5	15.6732	0.546573
ENSMUST00000134427_1	42924.5	62014.1	15.6549	0.530797
n271923_AK083973_1	39217.8	66229.7	15.6372	0.755969
n294617_AK013431_1	44731	56297.3	15.6149	0.33179
ENSMUST00000163363_2	39395.2	63832.7	15.6139	0.696276
n276834_AK140394_1	37907.6	65330.6	15.6028	0.78527
ENSMUST00000155345	41524.4	56588.3	15.5649	0.446544
n276152_AK081086_1	38765.3	59763.5	15.5547	0.624498
ENSMUST00000097436_1	37463.8	61477.7	15.5505	0.714566
ENSMUST00000151955	37459	60395.3	15.5376	0.689126
ENSMUST00000134099	35804.5	62796.2	15.5331	0.810536
n286081_AK137030_1	41313.7	53325.8	15.5184	0.368213
ENSMUST00000139514_1	37203.9	57747	15.5003	0.634294
ENSMUST00000144351	35873.3	59596.1	15.4968	0.732306
ENSMUST00000132261	34734.1	61063.5	15.491	0.813956
ENSMUST00000181343_1	36807.6	57329.7	15.4874	0.639278
ENSMUST00000142933	37666.6	54867.8	15.4723	0.542675
ENSMUST00000135091_1	35368.6	58041.3	15.4675	0.714611
ENSMUST00000156882	35181.9	57447.7	15.4563	0.707416
n264879_AK149722_2	33151.7	60567.8	15.4515	0.869469
ENSMUST00000122831	34949.3	56460.8	15.439	0.691987
ENSMUST00000151038_1	33982	56565.8	15.4201	0.735161
ENSMUST00000164149_1	31547.3	58522	15.391	0.891462
n265294_AK157531_1	32141.5	55706.1	15.3688	0.793396
ENSMUST00000136110_1	31625.5	55882.9	15.3595	0.821319
n269794_AK142725_1	34548.7	50373.4	15.3484	0.54403
ENSMUST00000144043	30757.5	53438.3	15.3071	0.796937
n263903_AK159006_1	37025.3	44228.2	15.3045	0.256455
n268682_AK087124_1	35421.3	44326.5	15.2741	0.323553
ENSMUST00000152171_5	32582.7	47582.2	15.265	0.546318
ENSMUST00000146333_1	31420.1	46739.9	15.2259	0.572967
ENSMUST00000132988	30899.5	45422.3	15.1932	0.555816
n284790_AK036497	29345.7	47549.7	15.189	0.696287
ENSMUST00000155125_5	28253.3	47275.7	15.1575	0.74268
n280143_AK042317_1	24062.9	53898.5	15.1362	1.16344
Firefly	28305.5	44276.7	15.1115	0.645466
ENSMUST00000145105_1	28560.7	42178.5	15.083	0.562477
ENSMUST00000154194	29170.7	37666.7	15.0166	0.36877
ENSMUST00000133755_2	27909.2	37550	14.9825	0.42807

## Sheet: 1c
	Sarrah
	CM	EC	FB
	0.0553678	0.0494467	0.0115289
	0.0429524	0.0532307	0.016828
	0.0392485	0.0523454	0.0216826
	0.0364062	0.0314901	0.0261017
	0.0684027	0.0444338	0.0223639
	CM	EC	FB
Sarrah	0.0484755	0.0461894	0.019701
SEM	0.00594099	0.0039827	0.00252017

## Sheet: 1d
	P0	Sarrah	D CT	2-deltaCT	mean	SEM
heart_PH15023	24.5288	31.6792	7.15041	0.00703902	1	0.0666445	heart young
heart_PH15025	24.9189	32.2596	7.34069	0.00616923
heart_PH15027	24.8261	32.1861	7.36	0.00608724
heart_PH15029	24.7922	32.3171	7.52491	0.00542971
heart_PH15031	24.5361	32.2215	7.68547	0.00485785
heart_PH15033	24.7102	32.4958	7.78554	0.0045323
heart_PH15024	24.6447	33.4351	8.79038	0.00225856	0.360625	0.0683043	heart old
heart_PH15026	24.5833	33.233	8.64974	0.00248983
heart_PH15028	25.1601	34.1821	9.02202	0.00192354
heart_PH15030	25.0283	33.1874	8.15913	0.00349829
heart_PH15032	24.6266	35.0654	10.4387	0.000720498
heart_PH15034	24.5745	34.0424	9.46792	0.00141212

## Sheet: 1e mouse
				Mouse cardiomyocytes
Control	Sarrah gapmeR		GapmeR ctrl.	1907.73
19092.4	36893.7		GapmeR Sarrah	3571.33
18148.9	36411.1		SEM ctrl.	92.1042
19990.8	33835.3		SEM kd	164.426
			ctrl. = 1
				Mouse cardiomyocytes
1907.73	3571.33		GapmeR ctrl.	1
92.1042	164.426		GapmeR Sarrah	1.87203
			SEM ctrl.	0.0482794
			SEM kd	0.0861889

## Sheet:  1e human
	GapmeR ctrl.	GapmeR Sarrah
	643	2574.39
	869.4	1266.6
	984.11	967.22
	1038.32	1114.69
	976.88	1122.55
	1229.78	1931.57
	GapmeR ctrl	GapmeR Oxct1AS			TTEST
Myocyte Medium	956.915	1496.17	1	1.56353	0.0721097
for manuscript figure:
	human cardiomyocytes	SEM
GapmeR ctrl.	956.915	79.251		1	0.0828193
GapmeR Sarrah	1496.17	256.238		1.56353	0.267775

## Sheet: 1f
Caspase Sarrah OE summary
delta blank
	mock	Sarrah
caspase assay 20190325	98791.5	7036.06
caspase assay 20190325	20677.1	1788.89
caspase assay 20190410	5436.01	694.218
caspase assay 20190410	4024.25	648.589
	59734.3
	4730.13
divided by average mock
	mock	Sarrah
caspase assay 20190325	1.65385	0.117789
caspase assay 20190325	0.346151	0.0299474
caspase assay 20190410	1.14923	0.0116218
caspase assay 20190410	0.85077	0.0108579
	mock	Sarrah
mean	1	0.0425541
SEM	0.273797	0.0254636

## Sheet: 2a
	peak height [µm]	contraction velocity [µm/s]	relaxation velocity [µm/s]
GapmeR ctrl.	0.759794	0.893662	0.948736
	2.68817	2.26578	1.61836
	0.428053	0.33721	0.365922
	0.428766	0.312751	0.37076
	1.50603	1.49048	0.63052
	0.495828	0.339494	0.293759
	0.324607	0.103534	0.129231
	0.654208	0.526564	0.448208
	0.906045	1.17228	0.661965
	0.906045	0.827569	0.676255
	1.26276	1.4513	0.954828
	0.636372	0.561478	0.486821
	0.238283	0.145355	0.282336
	1.653	0.970237	2.31867
	0.758367	0.889335	1.76941
	2.03682	1.6023	1.28187
	0.414498	0.389191	0.4728
	1.38546	1.29051	1.50436
	2.30792	3.8345	4.22192
	0.624957	0.741641	0.586353
	0.685598	1.48377	0.612334
	0.669189	0.431336	0.675403
	1.22923	0.93973	1.68918
	1.42676	1.65878	1.67375
	1.74413	2.0662	2.04495
	0.859936	0.71423	1.11514
	1.24382	1.26558	1.76942
	0.743869	0.620677	0.620796
	0.537373	0.374048	0.490689
	0.755649	0.67615	0.677264
	1.66825	1.85297	1.83979
	1.97314	1.95144	1.86888
	1.03075	1.06799	0.953114
	0.630574	0.409836	0.71069
	0.927498	2.99254	0.992087
	1.36093	1.3607	1.32818
	0.650322	0.46001	0.801883
	0.840187	1.04988	0.953674
	1.47838	1.26488	1.37199
	1.11806	1.07115	1.35344
	0.62018	0.521125	0.613862
	0.475356	0.223786	0.348574
	0.748373	0.290365	0.402004
	0.536681	0.303708	0.339841
	0.645472	0.239312	0.288654
	0.984319	0.564641	0.441331
GapmeR Sarrah	0.333881	0.379945	0.204708
	0.702007	0.346187	0.500841
	1.02519	0.624265	0.616768
	0.861813	0.486892	0.630296
	1.05372	0.969646	0.518938
	1.10081	0.721321	0.847995
	0.987376	1.29954	0.637687
	0.583579		0.488792
	0.56931	0.987224	0.648482
	0.679891	0.468696	0.342136
	0.819008	1.06235	0.487582
	0.583579	0.541481	0.433471
	0.838984	0.727476	0.685169
	0.472285	0.65117	0.42393
	0.572878	0.640661	0.713568
	0.247557	0.299339	0.240992
	0.383821		0.287756
	0.61925	0.471706	0.47616
	0.859673	0.76954	0.784163
	0.769782	0.880492	0.613005
	0.700907	0.903615	1.62778
	0.839841	0.897946	1.6348
	0.635424	0.668792	0.980669
	0.680465	0.752846	0.797458
	0.460457	0.487383	0.447202
	1.02208	1.14511	1.58559
	0.467733	0.633801	0.380791
	0.506884	0.57506	0.676054
	0.324295	0.126637	0.127953
	0.614636	0.491569	0.623451
	0.445213	0.204197	0.535356
	0.37973	0.231227	0.235815
	0.345083	0.284366	0.201002
	0.484017	0.318699	0.315177
	0.3631	0.141709	0.35179
	0.695363	0.659402	0.566186
	0.521436	0.431004	0.421033
	0.601817	0.30552	0.246996
	0.22867	0.0921942	0.106947
	0.670418	0.279328	0.456643
	0.402597	0.191348	0.26222
	0.214464	0.122381	0.0840532			peak height [µm]
	0.111909	0.06419	0.060687		GapmeR ctrl.	1
GapmeR ctrl.	1	1	1		GapmeR Sarrah	0.599557
GapmeR Sarrah	0.599557	0.544787	0.542049
SEM Gap ctrl.	0.0811877	0.112757	0.109694			contraction velocity [µm/s]
SEM Gap Sar	0.0381123	0.0497478	0.0573072		GapmeR ctrl.	1
					GapmeR Sarrah	0.544787
						relaxation velocity [µm/s]
					GapmeR ctrl.	1
					GapmeR Sarrah	0.542049

## Sheet: 2c
EHT number	Knockdown?	TUNEL positive cells		Apoptosis in EHT organoids
					TUNNEL positive cells per EHT
A2	ctrl	120		GapmeR ctrl.	134
A5	knockdown	314		GapmeR Sarrah	287.667
A6	knockdown	194		SEM ctrl.	11.1355
B1	ctrl	126		SEM kd	48.3057
B2	ctrl	156
B6	knockdown	355

## Sheet: 2d force dev.
ctrl.									mean	SEM		summary
	A1	A2	B1	B2	C1	C2	D1	D2					GapmeR ctrl.	GapmeR Sarrah	SEM ctrl.	SEM Sarrah knockdown
0	0	0	0	0	0	0	0	0	0	0		0	0	0	0	0
3	0	0	0	0	0	0	0	0	0	0		3	0	0	0	0
6	0.04	0.113	0.11	0.109	0.092	0.107	0.118	0.102	0.098875	0.00884477		6	0.098875	0.01375	0.00884477	0.00419928
8	0.135	0.106	0.128	0.136	0.133	0.13	0.113	0.125	0.12575	0.00382543		8	0.12575	0.063125	0.00382543	0.00191272
10	0.121	0.107	0.131	0.113	0.135	0.108	0.108	0.1	0.115375	0.00439536		10	0.115375	0.07725	0.00439536	0.00334744
Sarrah kd									mean	SEM
	A5	A6	B5	B6	C5	C6	D5	D6
0	0	0	0	0	0	0	0	0	0	0
3	0	0	0	0	0	0	0	0	0	0
6	0.02	0	0.02	0.02	0	0.03	0.02	0	0.01375	0.00419928
8	0.063	0.058	0.059	0.075	0.06	0.066	0.062	0.062	0.063125	0.00191272
10	0.073	0.076	0.075	0.098	0.067	0.078	0.07	0.081	0.07725	0.00334744

## Sheet: 2d FS
ctrl.									mean	SEM		summary
	A1	A2	B1	B2	C1	C2	D1	D2					GapmeR ctrl.	GapmeR Sarrah	SEM ctrl.	SEM Sarrah knockdown
0	0	0	0	0	0	0	0	0	0	0		0	0	0	0	0
3	0	0	0	0	0	0	0	0	0	0		3	0	0	0	0
6	0	6.73	7.678	7.529	6.352	7.697	9.863	7.975	6.728	1.02881		6	6.728	0	0.423734	0
8	12.053	7.756	10.693	10.265	10.912	10.01	9.603	9.993	10.1606	0.43474		8	10.1606	4.42225	0.43474	0.154753
10	9.77	9.963	11.761	10.492	12.095	9.607	10.788	10.559	10.6294	0.319191		10	10.6294	6.92963	0.319191	0.287241
Sarrah kd									mean	SEM
	A5	A6	B5	B6	C5	C6	D5	D6
0	0	0	0	0	0	0	0	0	0	0
3	0	0	0	0	0	0	0	0	0	0
6	0	0	0	0	0	0	0	0	0	0
8	4.451	4.227	3.961	5.261	4.2	4.894	4.255	4.129	4.42225	0.154753
10	6.775	6.792	6.356	8.685	5.898	7.027	6.737	7.167	6.92963	0.287241

[truncated: 61 more sheets: 3a, 3b, 3c, 3e, 3g, 3h, 3i, 3j, 4a, 4b, 4c, 4d, 4f, 4g, 4h, 5a, 5b, 5d, 5e, 5f …]
